# Supplementary material for: Origin of the electrocatalytic activity in carbon nanotube fiber counter-electrodes for solar-energy conversion
Source: Royal Society of Chemistry journal article supplement (doi:10.1039/d0na00492h), 2020-01-01
Supplement: d0na00492h1.pdf [file d0na00492h1.pdf]

Supplementary information

## **Origin of the electrocatalytic activity in carbon nanotube fiber counter-electrodes for solar-energy conversion**

*Alba Martínez-Muñoz<sup>ab</sup>, Moumita Rana<sup>a</sup>, Juan J. Vilatela<sup>a\*</sup> and Rubén D. Costa<sup>ac\*</sup>*

<sup>a</sup>IMDEA Materials Institute, c/ Eric Kandel 2, Getafe, 28906, Madrid, Spain E-mail: [juanjose.vilatela@imdea.org](mailto:juanjose.vilatela@imdea.org)

<sup>b</sup>Universidad Autónoma de Madrid, Departamento de Física Aplicada, Calle Francisco Tomás y Valiente, 7, 28049, Madrid, Spain

<sup>c</sup>Technical University of Munich, Chair of Biogenic Functional Materials Schulgasse, 22, 94315, Straubing, Germany. E-mail: [ruben.costa@tum.de](mailto:ruben.costa@tum.de)

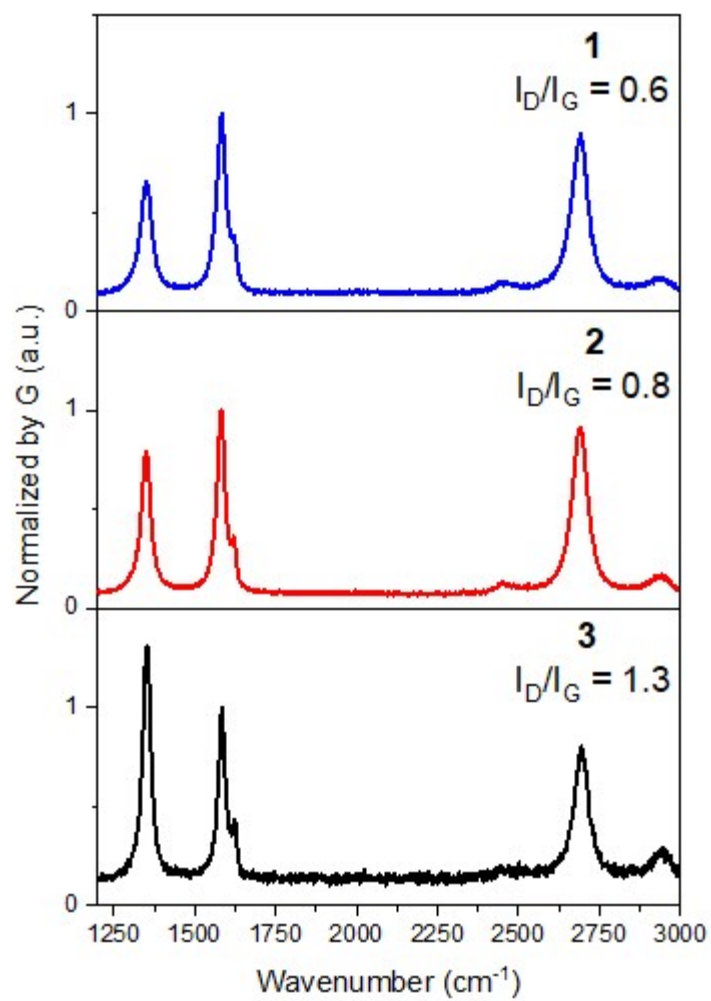

**Figure S1.** Raman characterization of CNTf electrodes upon ozonolysis treatment.

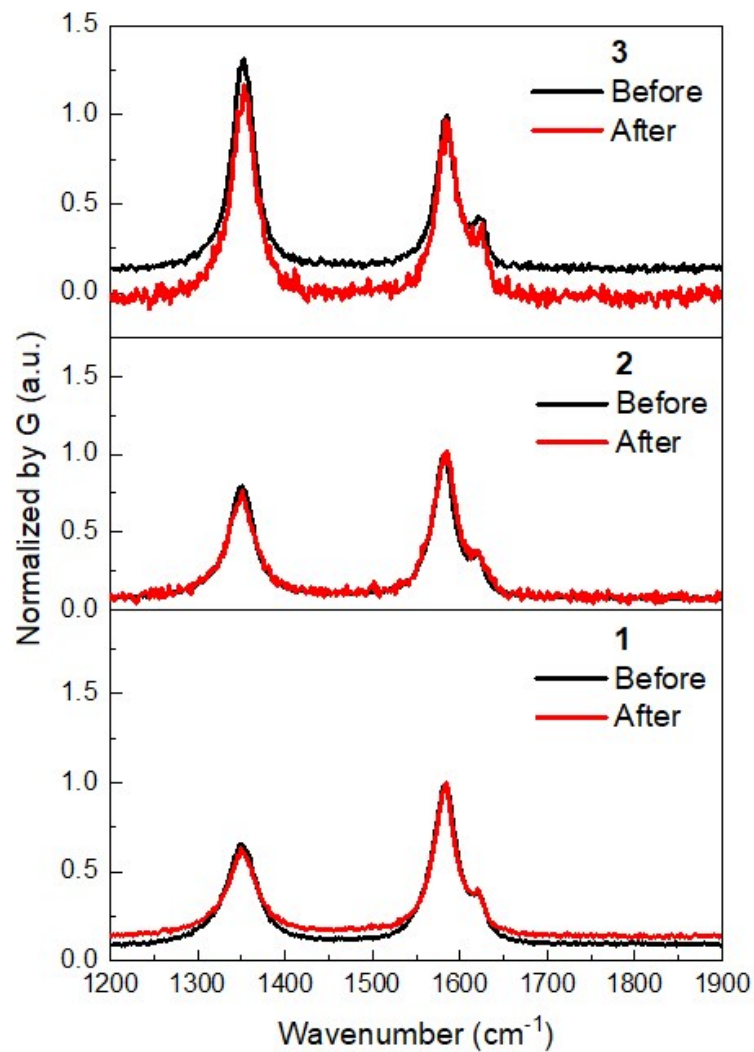

**Figure S2.** Raman spectra of the CNTf-electrodes before and after subjecting them to LSV assays in symmetric cells.

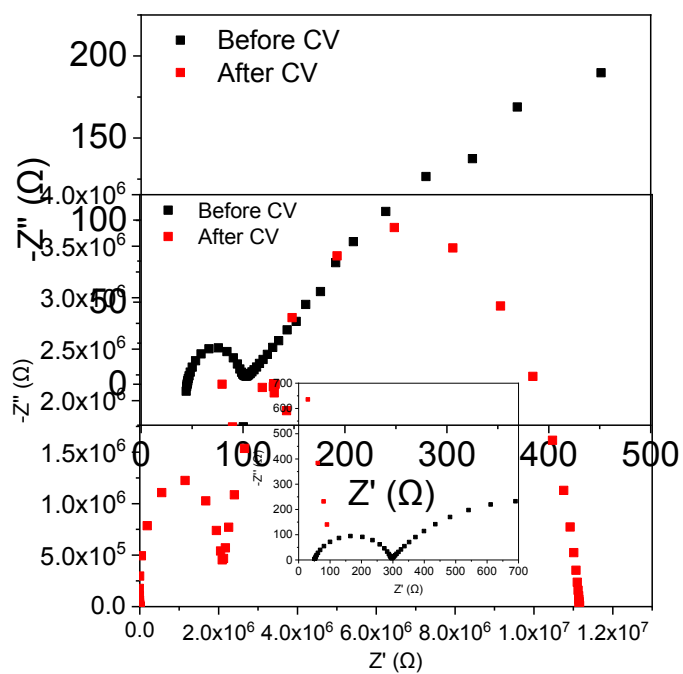

**Figure S3.** Nyquist plots of Pt (top) and **1** (bottom) symmetric cells before (black) and after (red) CV. Inset: zoom of the Nyquist plot of **1**-symmetric cell.

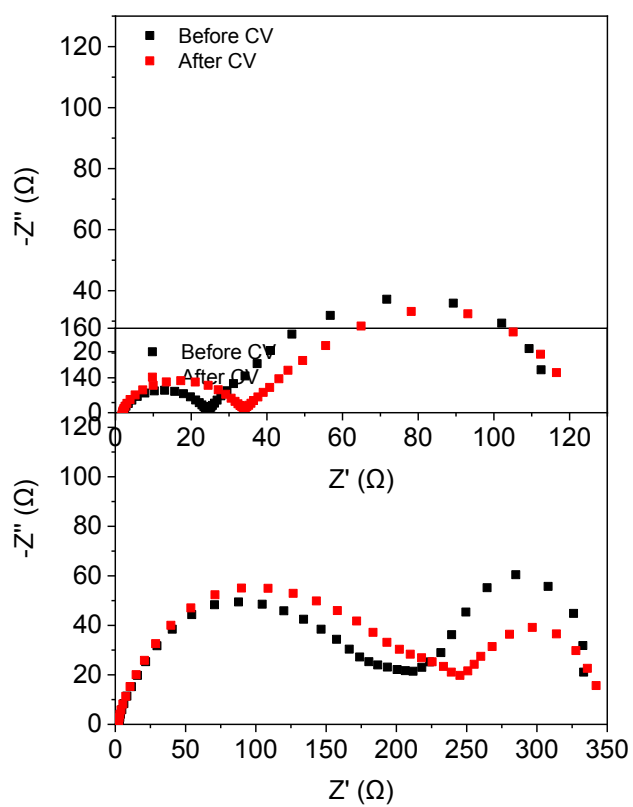

**Figure S4.** Nyquist plots of **3** (top) and **4** (bottom) symmetric cells before (black) and after (red) CV.

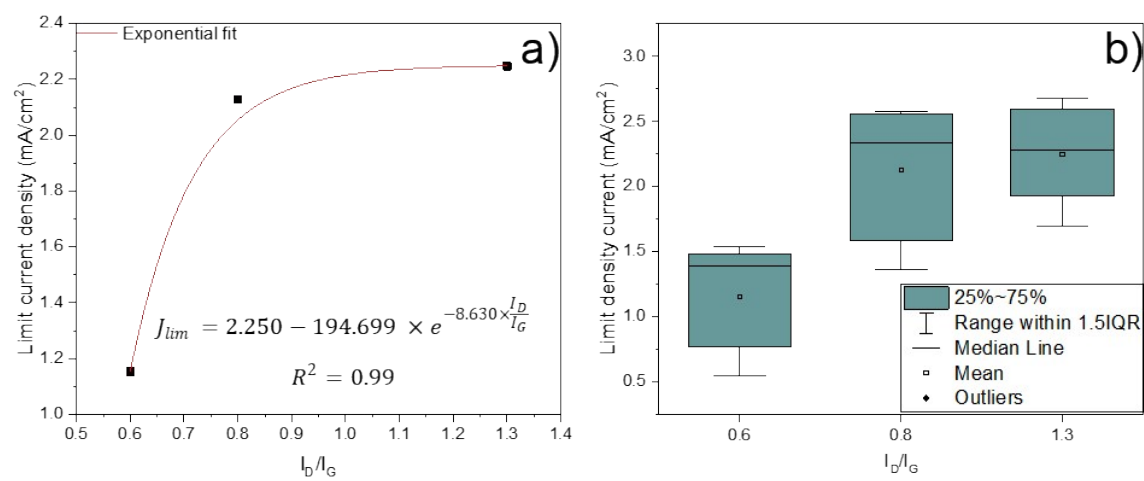

**Figure S5.** Exponential fit of the mean limit density current with  $I_D/I_G$  (a) and used statistics values (b).

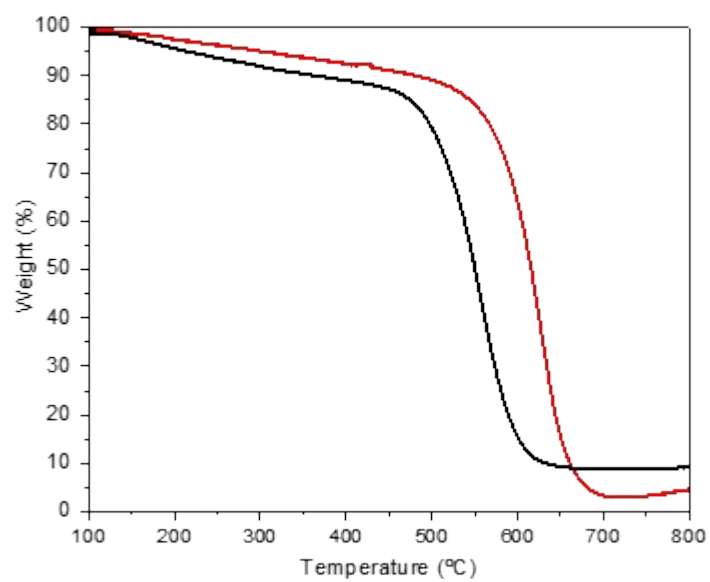

**Figure S6.** TGA of the CNTf-electrodes before (black; **1**) and after (red; **3-3%**) metal catalyst reduction.

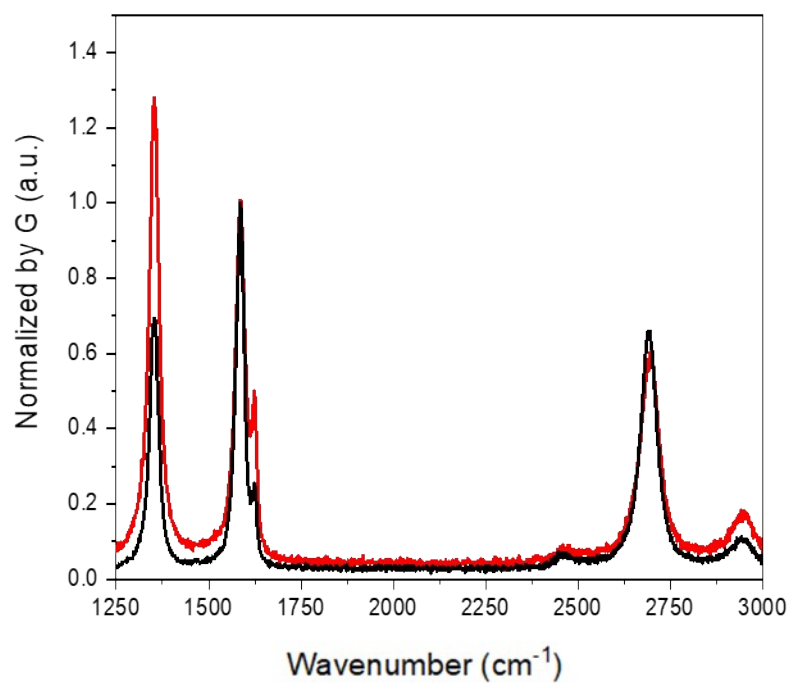

**Figure S7.** Raman spectra before (black; **1**) and after (red; **3-3%**) reduction of Fe catalyst.

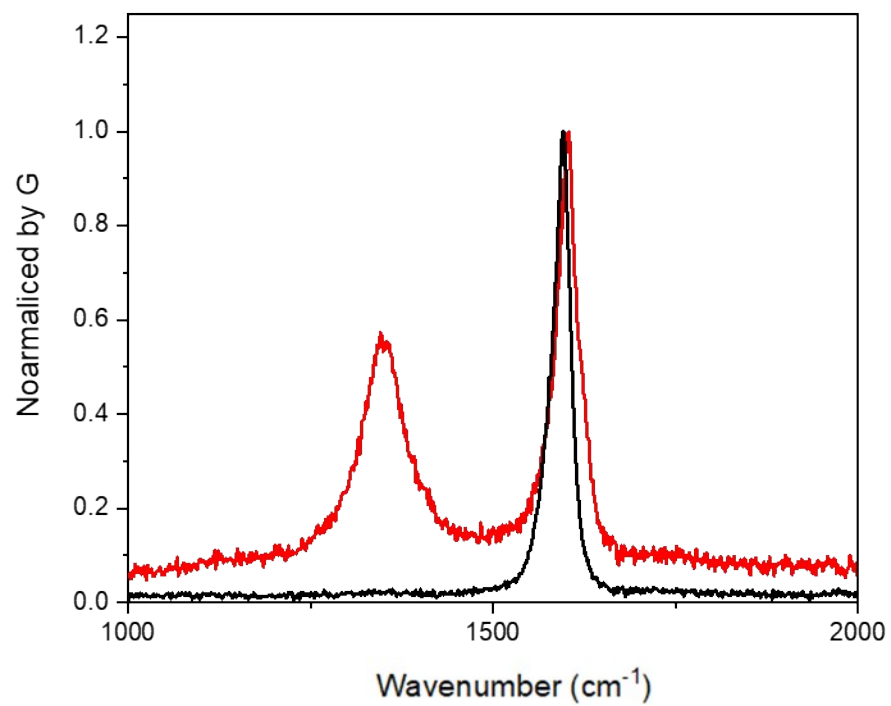

**Figure S8.** Raman spectra of commercial CNTf-electrodes without metal catalyst before (black) and after (red) ozonolysis functionalization.

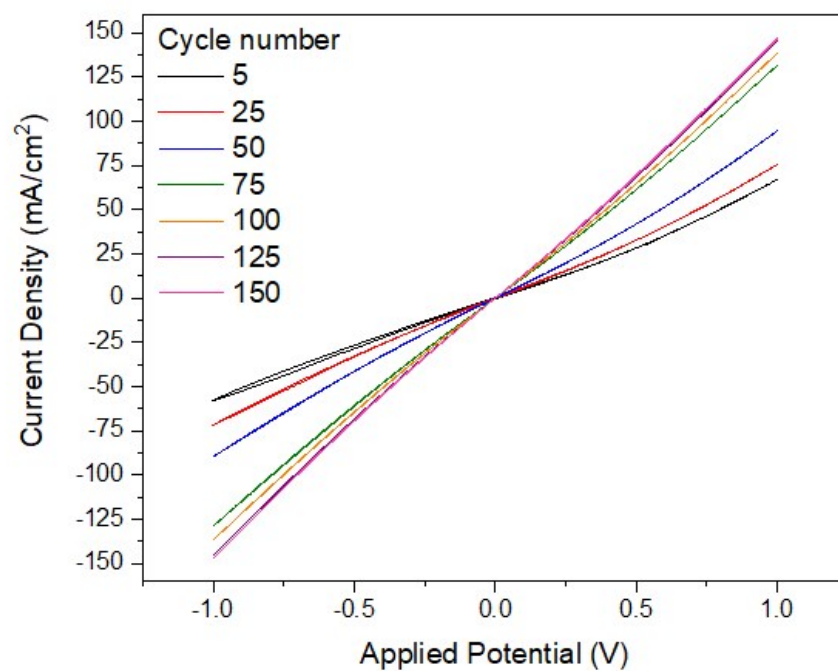

**Figure S9.** LSV of symmetric cells using a pristine commercial CNTf electrodes without catalyst.



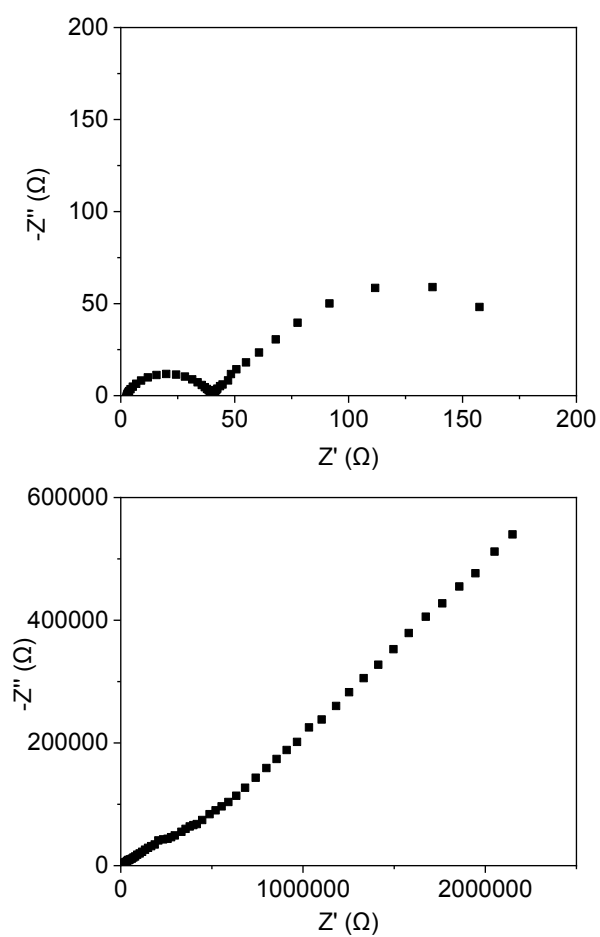

**Figure S10.** Nyquist plots of functionalized **3-3%** (top) and **3-0%** (bottom) symmetric cells.

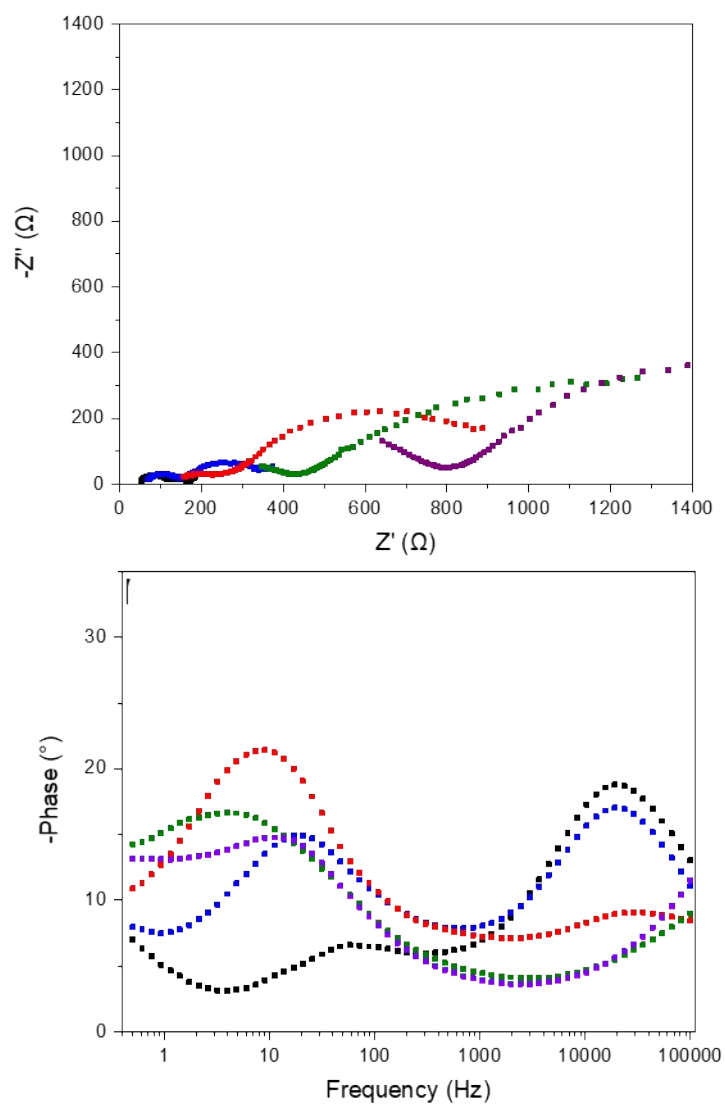

**Figure S11.** Nyquist (top) and Bode plots (bottom) of the DSSCs using **3**-CEs at different illumination conditions: 1 sun (black), 0.8 sun (blue), 0.6 sun (red), 0.4 sun (0.4), and 0.3 sun (purple).
